# Supplementary material for: Does Carrying a Rider Change Motor and Sensory Laterality in Horses?
Source: MDPI journal article supplement (doi:10.3390/ani12080992), 2022-04-12
Supplement: s1 [file s1]

## **File S1. List of Novel Objects.**

### **Sensory Laterality Object Test**

Novel Objects as chosen by the horses' owners:

- Pink gymnastic ball
- Red umbrella
- Wooden sled
- Pink bag
- Green stool
- Blue and yellow balloons
- Green bag
- Orange umbrella
- Green children wheelbarrow
- White plastic chair
- Car tire
- Multi-coloured plastic bag
- Brown basket
- Black safety vest
- Multi-coloured pillow
- Blue umbrella
- Red Bobbycar
- Silver windscreen cover
- Grey rubbish bag
- Green scooter
- Orange children's play tunnel
- Inline skates
- Multi-coloured blanket
- Pool noodle
- Green barrel
- Multi-coloured umbrella
- Green chair
- Green ball
- Red plastic bag
- Blue barrel
- Hazzard tape
- Empty plastic bottles
- Tin foil
- Wooden basket
- Plastic sandbox toys
- Gift wrapping
- Doll
- Watering can

## File S2. Statistical Data.

Difference in strength of laterality (absolute LI value) on population level without a rider in comparison to with a passive rider?

### Motor Laterality

```
Rcmdr> GLM.23 <- glm(ML_ABS ~ W.WO.Rider + age + breed + training +  
Rcmdr+   side.of...leading + sex, family=gaussian(identity), data=Dataset)
```

```
Rcmdr> summary(GLM.23)
```

```
Call:  
glm(formula = ML_ABS ~ W.WO.Rider + age + breed + training +  
    side.of...leading + sex, family = gaussian(identity), data = Dataset)
```

Deviance Residuals:

| Min      | 1Q       | Median   | 3Q      | Max     |
|----------|----------|----------|---------|---------|
| -0.44429 | -0.15008 | -0.00636 | 0.17003 | 0.66991 |

Coefficients:

|                           | Estimate   | Std. Error | t value | Pr(> t ) |
|---------------------------|------------|------------|---------|----------|
| (Intercept)               | 0.2105529  | 0.1723748  | 1.221   | 0.2296   |
| W.WO.Rider[T.with Rider]  | 0.1913043  | 0.0732465  | 2.612   | 0.0129 * |
| age                       | 0.0037207  | 0.0062871  | 0.592   | 0.5576   |
| breed[T.draught horse]    | -0.1594452 | 0.1493921  | -1.067  | 0.2928   |
| breed[T.pony]             | -0.0355526 | 0.1058317  | -0.336  | 0.7388   |
| breed[T.thoroughbred]     | 0.0939209  | 0.1177041  | 0.798   | 0.4300   |
| training                  | 0.0008157  | 0.0235237  | 0.035   | 0.9725   |
| side.of...leading[T.left] | -0.0895081 | 0.1023143  | -0.875  | 0.3873   |
| sex[T.mare]               | 0.1766685  | 0.0964912  | 1.831   | 0.0752 . |

---  
Signif. codes: 0 '\*\*\*' 0.001 '\*\*' 0.01 '\*' 0.05 '.' 0.1 ' ' 1

(Dispersion parameter for gaussian family taken to be 0.06169809)

Null deviance: 2.9983 on 45 degrees of freedom  
Residual deviance: 2.2828 on 37 degrees of freedom  
AIC: 12.394

Number of Fisher Scoring iterations: 2

---

```
Rcmdr> GLM.24 <- glm(ML_ABS ~ W.WO.Rider + age + breed + side.of...leading + sex,
```

```
Rcmdr+ family=gaussian(identity), data=Dataset)
```

```
Rcmdr> summary(GLM.24)
```

```
Call:
glm(formula = ML_ABS ~ W.WO.Rider + age + breed + side.of...leading +
    sex, family = gaussian(identity), data = Dataset)
```

Deviance Residuals:

| Min      | 1Q       | Median   | 3Q      | Max     |
|----------|----------|----------|---------|---------|
| -0.44613 | -0.15075 | -0.00628 | 0.17123 | 0.66982 |

Coefficients:

|                           | Estimate  | Std. Error | t value | Pr(> t ) |
|---------------------------|-----------|------------|---------|----------|
| (Intercept)               | 0.215154  | 0.108568   | 1.982   | 0.0548 . |
| W.WO.Rider[T.with Rider]  | 0.191304  | 0.072277   | 2.647   | 0.0118 * |
| age                       | 0.003735  | 0.006190   | 0.603   | 0.5498   |
| breed[T.draught horse]    | -0.157603 | 0.137777   | -1.144  | 0.2598   |
| breed[T.pony]             | -0.033996 | 0.094566   | -0.359  | 0.7212   |
| breed[T.thoroughbred]     | 0.093543  | 0.115647   | 0.809   | 0.4236   |
| side.of...leading[T.left] | -0.091223 | 0.088387   | -1.032  | 0.3086   |
| sex[T.mare]               | 0.176490  | 0.095078   | 1.856   | 0.0712 . |

---

Signif. codes: 0 '\*\*\*' 0.001 '\*\*' 0.01 '\*' 0.05 '.' 0.1 ' ' 1

(Dispersion parameter for gaussian family taken to be 0.06007641)

Null deviance: 2.9983 on 45 degrees of freedom  
Residual deviance: 2.2829 on 38 degrees of freedom  
AIC: 10.395

Number of Fisher Scoring iterations: 2

---

```
Rcmdr> GLM.25 <- glm(ML_ABS ~ W.WO.Rider + age + side.of...leading + sex,  
Rcmdr+ family=gaussian(identity), data=Dataset)
```

```
Rcmdr> summary(GLM.25)
```

```
Call:
glm(formula = ML_ABS ~ W.WO.Rider + age + side.of...leading +
    sex, family = gaussian(identity), data = Dataset)
```

Deviance Residuals:

| Min      | 1Q       | Median  | 3Q      | Max     |
|----------|----------|---------|---------|---------|
| -0.38513 | -0.18603 | 0.00618 | 0.17848 | 0.65644 |

Coefficients:

|                           | Estimate  | Std. Error | t value | Pr(> t ) |
|---------------------------|-----------|------------|---------|----------|
| (Intercept)               | 0.194397  | 0.104565   | 1.859   | 0.0702 . |
| w.WO.Rider[T.with Rider]  | 0.191304  | 0.071572   | 2.673   | 0.0107 * |
| age                       | 0.003464  | 0.006071   | 0.571   | 0.5715   |
| side.of...leading[T.left] | -0.055994 | 0.083188   | -0.673  | 0.5047   |
| sex[T.mare]               | 0.127640  | 0.087036   | 1.467   | 0.1501   |

---

Signif. codes: 0 '\*\*\*' 0.001 '\*\*' 0.01 '\*' 0.05 '.' 0.1 ' ' 1

(Dispersion parameter for gaussian family taken to be 0.05890908)

Null deviance: 2.9983 on 45 degrees of freedom  
Residual deviance: 2.4153 on 41 degrees of freedom  
AIC: 6.9882

Number of Fisher Scoring iterations: 2

---

```
Rcmdr> GLM.26 <- glm(ML_ABS ~ w.WO.Rider + side.of...leading + sex,  
Rcmdr+   family=gaussian(identity), data=Dataset)
```

```
Rcmdr> summary(GLM.26)
```

Call:

```
glm(formula = ML_ABS ~ w.WO.Rider + side.of...leading + sex,  
     family = gaussian(identity), data = Dataset)
```

Deviance Residuals:

| Min      | 1Q       | Median  | 3Q      | Max     |
|----------|----------|---------|---------|---------|
| -0.37701 | -0.18353 | 0.01429 | 0.17371 | 0.62299 |

Coefficients:

|                           | Estimate | Std. Error | t value | Pr(> t )   |
|---------------------------|----------|------------|---------|------------|
| (Intercept)               | 0.23281  | 0.07935    | 2.934   | 0.00541 ** |
| w.WO.Rider[T.with Rider]  | 0.19130  | 0.07099    | 2.695   | 0.01009 *  |
| side.of...leading[T.left] | -0.04710 | 0.08106    | -0.581  | 0.56427    |
| sex[T.mare]               | 0.12922  | 0.08629    | 1.497   | 0.14175    |

---

Signif. codes: 0 '\*\*\*' 0.001 '\*\*' 0.01 '\*' 0.05 '.' 0.1 ' ' 1

(Dispersion parameter for gaussian family taken to be 0.05796298)

Null deviance: 2.9983 on 45 degrees of freedom  
Residual deviance: 2.4344 on 42 degrees of freedom  
AIC: 5.3519

Number of Fisher Scoring iterations: 2

---

```
Rcmdr> GLM.27 <- glm(ML_ABS ~ w.WO.Rider + sex, family=gaussian(identity),  
Rcmdr+ data=Dataset)
```

```
Rcmdr> summary(GLM.27)
```

```
Call:  
glm(formula = ML_ABS ~ w.WO.Rider + sex, family = gaussian(identity),  
data = Dataset)
```

Deviance Residuals:

| Min      | 1Q       | Median  | 3Q      | Max     |
|----------|----------|---------|---------|---------|
| -0.39010 | -0.19010 | 0.00121 | 0.20121 | 0.60990 |

Coefficients:

|                          | Estimate | Std. Error | t value | Pr(> t )    |
|--------------------------|----------|------------|---------|-------------|
| (Intercept)              | 0.19879  | 0.05316    | 3.740   | 0.00054 *** |
| w.WO.Rider[T.With Rider] | 0.19130  | 0.07045    | 2.716   | 0.00949 **  |
| sex[T.mare]              | 0.12556  | 0.08539    | 1.470   | 0.14876     |

---

Signif. codes: 0 '\*\*\*' 0.001 '\*\*' 0.01 '\*' 0.05 '.' 0.1 ' ' 1

(Dispersion parameter for gaussian family taken to be 0.05707022)

Null deviance: 2.9983 on 45 degrees of freedom  
Residual deviance: 2.4540 on 43 degrees of freedom  
AIC: 3.7203

Number of Fisher Scoring iterations: 2

---

```
Rcmdr> GLM.28 <- glm(ML_ABS ~ w.WO.Rider, family=gaussian(identity), data=Dataset)
```

```
Rcmdr> summary(GLM.28)
```

```
Call:
glm(formula = ML_ABS ~ W.WO.Rider, family = gaussian(identity),
     data = Dataset)
```

```
Deviance Residuals:
```

| Min      | 1Q       | Median   | 3Q      | Max     |
|----------|----------|----------|---------|---------|
| -0.41739 | -0.21739 | -0.02174 | 0.17391 | 0.58261 |

```
Coefficients:
```

|                          | Estimate | Std. Error | t value | Pr(> t )      |
|--------------------------|----------|------------|---------|---------------|
| (Intercept)              | 0.22609  | 0.05047    | 4.48    | 0.0000526 *** |
| W.WO.Rider[T.With Rider] | 0.19130  | 0.07137    | 2.68    | 0.0103 *      |

```
---
Signif. codes:  0 '***' 0.001 '**' 0.01 '*' 0.05 '.' 0.1 ' ' 1
```

```
(Dispersion parameter for gaussian family taken to be 0.05857708)
```

```
Null deviance: 2.9983  on 45  degrees of freedom
Residual deviance: 2.5774  on 44  degrees of freedom
AIC: 3.9766
```

```
Number of Fisher Scoring iterations: 2
```

---

```
Rcmdr> anova(GLM.28, GLM.27, test="F")
Analysis of Deviance Table
```

```
Model 1: ML_ABS ~ W.WO.Rider
```

```
Model 2: ML_ABS ~ W.WO.Rider + sex
```

|   | Resid. Df | Resid. Dev | Df | Deviance | F      | Pr(>F) |
|---|-----------|------------|----|----------|--------|--------|
| 1 | 44        | 2.5774     |    |          |        |        |
| 2 | 43        | 2.4540     | 1  | 0.12337  | 2.1618 | 0.1488 |

Result: Significant difference in strength of motor laterality; horses showed stronger motor laterality with a passive rider than without.

## Sensory Laterality Novel Object Test

```
Rcmdr> GLM.30 <- glm(NO_ABS ~ W.WO.Rider + training + side.of...leading + sex +  
Rcmdr+   age + breed, family=gaussian(identity), data=Dataset)
```

```
Rcmdr> summary(GLM.30)
```

```
Call:  
glm(formula = NO_ABS ~ W.WO.Rider + training + side.of...leading +  
    sex + age + breed, family = gaussian(identity), data = Dataset)
```

Deviance Residuals:

| Min      | 1Q       | Median   | 3Q      | Max     |
|----------|----------|----------|---------|---------|
| -0.47205 | -0.24158 | -0.08649 | 0.30006 | 0.67263 |

Coefficients:

|                           | Estimate   | Std. Error | t value | Pr(> t )  |
|---------------------------|------------|------------|---------|-----------|
| (Intercept)               | 0.7234006  | 0.2377449  | 3.043   | 0.0043 ** |
| W.WO.Rider[T.With Rider]  | 0.0289870  | 0.1010239  | 0.287   | 0.7758    |
| training                  | 0.0003781  | 0.0324446  | 0.012   | 0.9908    |
| side.of...leading[T.left] | -0.1255022 | 0.1411152  | -0.889  | 0.3796    |
| sex[T.mare]               | -0.0306433 | 0.1330837  | -0.230  | 0.8192    |
| age                       | -0.0054962 | 0.0086713  | -0.634  | 0.5301    |
| breed[T.draught horse]    | 0.0838942  | 0.2060464  | 0.407   | 0.6862    |
| breed[T.pony]             | -0.1271128 | 0.1459665  | -0.871  | 0.3895    |
| breed[T.thoroughbred]     | -0.2015395 | 0.1623413  | -1.241  | 0.2223    |

---  
Signif. codes: 0 '\*\*\*' 0.001 '\*\*' 0.01 '\*' 0.05 '.' 0.1 ' ' 1

(Dispersion parameter for gaussian family taken to be 0.1173671)

Null deviance: 5.0338 on 45 degrees of freedom  
Residual deviance: 4.3426 on 37 degrees of freedom  
AIC: 41.974

Number of Fisher Scoring iterations: 2

---

```
Rcmdr> GLM.31 <- glm(NO_ABS ~ W.WO.Rider + side.of...leading + sex + age + breed,  
Rcmdr+   family=gaussian(identity), data=Dataset)
```

```
Rcmdr> summary(GLM.31)
```

```
Call:
glm(formula = NO_ABS ~ W.WO.Rider + side.of...leading + sex +
    age + breed, family = gaussian(identity), data = Dataset)
```

```
Deviance Residuals:
```

| Min      | 1Q       | Median   | 3Q      | Max     |
|----------|----------|----------|---------|---------|
| -0.47298 | -0.24159 | -0.08649 | 0.30016 | 0.67316 |

```
Coefficients:
```

|                           | Estimate  | Std. Error | t value | Pr(> t )      |
|---------------------------|-----------|------------|---------|---------------|
| (Intercept)               | 0.725533  | 0.149739   | 4.845   | 0.0000215 *** |
| W.WO.Rider[T.with Rider]  | 0.028987  | 0.099686   | 0.291   | 0.773         |
| side.of...leading[T.left] | -0.126297 | 0.121905   | -1.036  | 0.307         |
| sex[T.mare]               | -0.030726 | 0.131133   | -0.234  | 0.816         |
| age                       | -0.005489 | 0.008537   | -0.643  | 0.524         |
| breed[T.draught horse]    | 0.084748  | 0.190023   | 0.446   | 0.658         |
| breed[T.pony]             | -0.126391 | 0.130427   | -0.969  | 0.339         |
| breed[T.thoroughbred]     | -0.201715 | 0.159502   | -1.265  | 0.214         |

```
---
Signif. codes:  0 '***' 0.001 '**' 0.01 '*' 0.05 '.' 0.1 ' ' 1
```

```
(Dispersion parameter for gaussian family taken to be 0.1142789)
```

```
Null deviance: 5.0338  on 45  degrees of freedom
Residual deviance: 4.3426  on 38  degrees of freedom
AIC: 39.975
```

```
Number of Fisher Scoring iterations: 2
```

---

```
Rcmdr> GLM.32 <- glm(NO_ABS ~ W.WO.Rider + side.of...leading + age + breed,
Rcmdr+   family=gaussian(identity), data=Dataset)
```

```
Rcmdr> summary(GLM.32)
```

```
Call:
glm(formula = NO_ABS ~ W.WO.Rider + side.of...leading + age +
    breed, family = gaussian(identity), data = Dataset)
```

```
Deviance Residuals:
```

| Min | 1Q | Median | 3Q | Max |
|-----|----|--------|----|-----|
|-----|----|--------|----|-----|



-0.46640 -0.23623 -0.08902 0.30184 0.65609

Coefficients:

|                           | Estimate  | Std. Error | t value | Pr(> t )      |
|---------------------------|-----------|------------|---------|---------------|
| (Intercept)               | 0.724279  | 0.147819   | 4.900   | 0.0000172 *** |
| w.WO.Rider[T.with Rider]  | 0.028987  | 0.098471   | 0.294   | 0.770         |
| side.of...leading[T.left] | -0.129990 | 0.119408   | -1.089  | 0.283         |
| age                       | -0.005560 | 0.008428   | -0.660  | 0.513         |
| breed[T.draught horse]    | 0.073514  | 0.181634   | 0.405   | 0.688         |
| breed[T.pony]             | -0.133608 | 0.125193   | -1.067  | 0.292         |
| breed[T.thoroughbred]     | -0.195751 | 0.155539   | -1.259  | 0.216         |

---

Signif. codes: 0 '\*\*\*' 0.001 '\*\*' 0.01 '\*' 0.05 '.' 0.1 ' ' 1

(Dispersion parameter for gaussian family taken to be 0.1115096)

Null deviance: 5.0338 on 45 degrees of freedom  
Residual deviance: 4.3489 on 39 degrees of freedom  
AIC: 38.041

Number of Fisher Scoring iterations: 2

---

```
Rcmdr> GLM.33 <- glm(NO_ABS ~ w.WO.Rider + side.of...leading + age,  
Rcmdr+   family=gaussian(identity), data=Dataset)
```

```
Rcmdr> summary(GLM.33)
```

Call:

```
glm(formula = NO_ABS ~ w.WO.Rider + side.of...leading + age,  
     family = gaussian(identity), data = Dataset)
```

Deviance Residuals:

| Min     | 1Q      | Median  | 3Q     | Max    |
|---------|---------|---------|--------|--------|
| -0.4550 | -0.1731 | -0.1358 | 0.3232 | 0.5781 |

Coefficients:

|                           | Estimate  | Std. Error | t value | Pr(> t )      |
|---------------------------|-----------|------------|---------|---------------|
| (Intercept)               | 0.705003  | 0.142306   | 4.954   | 0.0000124 *** |
| w.WO.Rider[T.with Rider]  | 0.028987  | 0.098091   | 0.296   | 0.769         |
| side.of...leading[T.left] | -0.183786 | 0.113764   | -1.616  | 0.114         |
| age                       | -0.004731 | 0.008317   | -0.569  | 0.572         |

---

Signif. codes: 0 '\*\*\*' 0.001 '\*\*' 0.01 '\*' 0.05 '.' 0.1 ' ' 1

(Dispersion parameter for gaussian family taken to be 0.1106513)

Null deviance: 5.0338 on 45 degrees of freedom  
Residual deviance: 4.6474 on 42 degrees of freedom  
AIC: 35.095

Number of Fisher Scoring iterations: 2

---

```
Rcmdr> GLM.34 <- glm(NO_ABS ~ W.WO.Rider + side.of...leading,  
Rcmdr+   family=gaussian(identity), data=Dataset)
```

```
Rcmdr> summary(GLM.34)
```

Call:

```
glm(formula = NO_ABS ~ W.WO.Rider + side.of...leading, family = gaussian(identity),  
    data = Dataset)
```

Deviance Residuals:

| Min     | 1Q      | Median  | 3Q     | Max    |
|---------|---------|---------|--------|--------|
| -0.4851 | -0.1517 | -0.1228 | 0.3188 | 0.5439 |

Coefficients:

|                           | Estimate | Std. Error | t value | Pr(> t )    |     |
|---------------------------|----------|------------|---------|-------------|-----|
| (Intercept)               | 0.65217  | 0.10697    | 6.097   | 0.000000265 | *** |
| W.WO.Rider[T.with Rider]  | 0.02899  | 0.09732    | 0.298   | 0.7672      |     |
| side.of...leading[T.left] | -0.19608 | 0.11081    | -1.769  | 0.0839      | .   |

---

Signif. codes: 0 '\*\*\*' 0.001 '\*\*' 0.01 '\*' 0.05 '.' 0.1 ' ' 1

(Dispersion parameter for gaussian family taken to be 0.1089107)

Null deviance: 5.0338 on 45 degrees of freedom  
Residual deviance: 4.6832 on 43 degrees of freedom  
AIC: 33.448

Number of Fisher Scoring iterations: 2

---

```
Rcmdr> GLM.35 <- glm(NO_ABS ~ W.WO.Rider, family=gaussian(identity), data=Dataset)
```

```
Rcmdr> summary(GLM.35)
```

```
Call:
glm(formula = NO_ABS ~ W.WO.Rider, family = gaussian(identity),
     data = Dataset)
```

```
Deviance Residuals:
```

| Min     | 1Q      | Median  | 3Q     | Max    |
|---------|---------|---------|--------|--------|
| -0.5362 | -0.2029 | -0.1739 | 0.4638 | 0.4928 |

```
Coefficients:
```

|                          | Estimate | Std. Error | t value | Pr(> t )          |
|--------------------------|----------|------------|---------|-------------------|
| (Intercept)              | 0.50725  | 0.07046    | 7.199   | 0.00000000584 *** |
| W.WO.Rider[T.With Rider] | 0.02899  | 0.09965    | 0.291   | 0.772             |

```
---
Signif. codes:  0 '***' 0.001 '**' 0.01 '*' 0.05 '.' 0.1 ' ' 1
```

```
(Dispersion parameter for gaussian family taken to be 0.1141855)
```

```
Null deviance: 5.0338 on 45 degrees of freedom
Residual deviance: 5.0242 on 44 degrees of freedom
AIC: 34.681
```

```
Number of Fisher Scoring iterations: 2
```

---

```
Rcmdr> anova(GLM.35, GLM.34, test="F")
Analysis of Deviance Table
```

```
Model 1: NO_ABS ~ W.WO.Rider
```

```
Model 2: NO_ABS ~ W.WO.Rider + side.of...leading
```

|   | Resid. Df | Resid. Dev | Df | Deviance | F     | Pr(>F)    |
|---|-----------|------------|----|----------|-------|-----------|
| 1 | 44        | 5.0242     |    |          |       |           |
| 2 | 43        | 4.6832     | 1  | 0.341    | 3.131 | 0.08391 . |

```
---
Signif. codes:  0 '***' 0.001 '**' 0.01 '*' 0.05 '.' 0.1 ' ' 1
```

Result: No significant difference in the strength of sensory laterality in the novel object test.

## Sensory Laterality Person Test

```
Rcmdr> GLM.37 <- glm(Person_ABS ~ W.WO.Rider + training + side.of...leading + sex  
Rcmdr+   + age + breed, family=gaussian(identity), data=Dataset)
```

```
Rcmdr> summary(GLM.37)
```

```
Call:  
glm(formula = Person_ABS ~ W.WO.Rider + training + side.of...leading +  
sex + age + breed, family = gaussian(identity), data = Dataset)
```

Deviance Residuals:

| Min      | 1Q       | Median  | 3Q      | Max     |
|----------|----------|---------|---------|---------|
| -0.68543 | -0.22556 | 0.07285 | 0.22282 | 0.50839 |

Coefficients:

|                           | Estimate  | Std. Error | t value | Pr(> t )   |
|---------------------------|-----------|------------|---------|------------|
| (Intercept)               | 0.738614  | 0.212052   | 3.483   | 0.00129 ** |
| W.WO.Rider[T.With Rider]  | -0.017391 | 0.090106   | -0.193  | 0.84801    |
| training                  | 0.011574  | 0.028938   | 0.400   | 0.69149    |
| side.of...leading[T.left] | -0.062378 | 0.125865   | -0.496  | 0.62311    |
| sex[T.mare]               | -0.198160 | 0.118702   | -1.669  | 0.10348    |
| age                       | 0.002435  | 0.007734   | 0.315   | 0.75467    |
| breed[T.draught horse]    | 0.284026  | 0.183779   | 1.545   | 0.13074    |
| breed[T.pony]             | -0.279902 | 0.130192   | -2.150  | 0.03817 *  |
| breed[T.thoroughbred]     | -0.041021 | 0.144797   | -0.283  | 0.77853    |

---

Signif. codes: 0 '\*\*\*' 0.001 '\*\*' 0.01 '\*' 0.05 '.' 0.1 ' ' 1

(Dispersion parameter for gaussian family taken to be 0.09337052)

Null deviance: 5.0122 on 45 degrees of freedom  
Residual deviance: 3.4547 on 37 degrees of freedom  
AIC: 31.453

Number of Fisher Scoring iterations: 2

---

```
Rcmdr> GLM.38 <- glm(Person_ABS ~ W.WO.Rider + training + side.of...leading + sex  
Rcmdr+   + breed, family=gaussian(identity), data=Dataset)
```

```
Rcmdr> summary(GLM.38)
```

```
Call:
glm(formula = Person_ABS ~ W.WO.Rider + training + side.of...leading +
    sex + breed, family = gaussian(identity), data = Dataset)
```

```
Deviance Residuals:
    Min       1Q   Median       3Q      Max
-0.71162  -0.22272   0.06393   0.21660   0.50872
```

```
Coefficients:
              Estimate Std. Error t value Pr(>|t|)
(Intercept)    0.76169    0.19661   3.874 0.000409 ***
W.WO.Rider[T.With Rider] -0.01739    0.08903  -0.195 0.846169
training        0.01219    0.02853   0.427 0.671627
side.of...leading[T.left] -0.05447    0.12186  -0.447 0.657433
sex[T.mare]     -0.19671    0.11720  -1.678 0.101472
breed[T.draught horse]  0.28728    0.18130   1.585 0.121359
breed[T.pony]    -0.28386    0.12804  -2.217 0.032678 *
breed[T.thoroughbred] -0.03915    0.14295  -0.274 0.785659
```

```
---
Signif. codes:  0 '***' 0.001 '**' 0.01 '*' 0.05 '.' 0.1 ' ' 1
```

```
(Dispersion parameter for gaussian family taken to be 0.09115693)
```

```
Null deviance: 5.0122 on 45 degrees of freedom
Residual deviance: 3.4640 on 38 degrees of freedom
AIC: 29.576
```

```
Number of Fisher Scoring iterations: 2
```

---

```
Rcmdr> GLM.39 <- glm(Person_ABS ~ W.WO.Rider + side.of...leading + sex + breed,
Rcmdr+   family=gaussian(identity), data=Dataset)
```

```
Rcmdr> summary(GLM.39)
```

```
Call:
glm(formula = Person_ABS ~ W.WO.Rider + side.of...leading + sex +
    breed, family = gaussian(identity), data = Dataset)
```

```
Deviance Residuals:
    Min       1Q   Median       3Q      Max
-0.69130  -0.21316   0.06404   0.24665   0.52489
```

```
Coefficients:
```

|                           | Estimate | Std. Error | t value | Pr(> t )     |
|---------------------------|----------|------------|---------|--------------|
| (Intercept)               | 0.83284  | 0.10338    | 8.056   | 7.97e-10 *** |
| W.WO.Rider[T.With Rider]  | -0.01739 | 0.08809    | -0.197  | 0.8445       |
| side.of...leading[T.left] | -0.07949 | 0.10574    | -0.752  | 0.4567       |
| sex[T.mare]               | -0.19926 | 0.11581    | -1.721  | 0.0933 .     |
| breed[T.draught horse]    | 0.31523  | 0.16730    | 1.884   | 0.0670 .     |
| breed[T.pony]             | -0.26085 | 0.11493    | -2.270  | 0.0288 *     |
| breed[T.thoroughbred]     | -0.04466 | 0.14087    | -0.317  | 0.7529       |

---  
Signif. codes: 0 '\*\*\*' 0.001 '\*\*' 0.01 '\*' 0.05 '.' 0.1 ' ' 1

(Dispersion parameter for gaussian family taken to be 0.08924619)

Null deviance: 5.0122 on 45 degrees of freedom  
Residual deviance: 3.4806 on 39 degrees of freedom  
AIC: 27.796

Number of Fisher Scoring iterations: 2

```
Rcmdr> GLM.40 <- glm(Person_ABS ~ W.WO.Rider + sex + breed,
Rcmdr+   family=gaussian(identity), data=Dataset)
```

```
Rcmdr> summary(GLM.40)
```

```
Call:
glm(formula = Person_ABS ~ W.WO.Rider + sex + breed, family = gaussian(identity),
    data = Dataset)
```

Deviance Residuals:

| Min      | 1Q       | Median  | 3Q      | Max     |
|----------|----------|---------|---------|---------|
| -0.69130 | -0.17967 | 0.06735 | 0.23621 | 0.50416 |

Coefficients:

|                          | Estimate | Std. Error | t value | Pr(> t )     |
|--------------------------|----------|------------|---------|--------------|
| (Intercept)              | 0.77967  | 0.07498    | 10.398  | 6.19e-13 *** |
| W.WO.Rider[T.With Rider] | -0.01739 | 0.08761    | -0.198  | 0.8437       |
| sex[T.mare]              | -0.21134 | 0.11407    | -1.853  | 0.0713 .     |
| breed[T.draught horse]   | 0.33469  | 0.16439    | 2.036   | 0.0484 *     |
| breed[T.pony]            | -0.26644 | 0.11407    | -2.336  | 0.0246 *     |
| breed[T.thoroughbred]    | -0.07098 | 0.13570    | -0.523  | 0.6039       |

---  
Signif. codes: 0 '\*\*\*' 0.001 '\*\*' 0.01 '\*' 0.05 '.' 0.1 ' ' 1

(Dispersion parameter for gaussian family taken to be 0.08827586)

Null deviance: 5.0122 on 45 degrees of freedom  
Residual deviance: 3.5310 on 40 degrees of freedom  
AIC: 26.458

Number of Fisher Scoring iterations: 2

---

```
Rcmdr> GLM.41 <- glm(Person_ABS ~ W.WO.Rider + breed, family=gaussian(identity),  
Rcmdr+ data=Dataset)
```

```
Rcmdr> summary(GLM.41)
```

```
Call:  
glm(formula = Person_ABS ~ W.WO.Rider + breed, family = gaussian(identity),  
data = Dataset)
```

Deviance Residuals:

| Min      | 1Q       | Median  | 3Q      | Max     |
|----------|----------|---------|---------|---------|
| -0.69130 | -0.19527 | 0.05284 | 0.25284 | 0.58870 |

Coefficients:

|                          | Estimate | Std. Error | t value | Pr(> t )     |
|--------------------------|----------|------------|---------|--------------|
| (Intercept)              | 0.74716  | 0.07503    | 9.958   | 1.66e-12 *** |
| W.WO.Rider[T.With Rider] | -0.01739 | 0.09018    | -0.193  | 0.84802      |
| breed[T.draught horse]   | 0.26154  | 0.16424    | 1.592   | 0.11897      |
| breed[T.pony]            | -0.31846 | 0.11379    | -2.799  | 0.00778 **   |
| breed[T.thoroughbred]    | -0.03846 | 0.13850    | -0.278  | 0.78264      |

---  
Signif. codes: 0 '\*\*\*' 0.001 '\*\*' 0.01 '\*' 0.05 '.' 0.1 ' ' 1

(Dispersion parameter for gaussian family taken to be 0.09351366)

Null deviance: 5.0122 on 45 degrees of freedom  
Residual deviance: 3.8341 on 41 degrees of freedom  
AIC: 28.245

Number of Fisher Scoring iterations: 2

---

```
Rcmdr> anova(GLM.41, GLM.40, test="F")  
Analysis of Deviance Table
```

```

Model 1: Person_ABS ~ W.WO.Rider + breed
Model 2: Person_ABS ~ W.WO.Rider + sex + breed
      Resid. Df Resid. Dev Df Deviance      F Pr(>F)
1         41      3.8341
2         40      3.5310  1  0.30303 3.4327 0.07131 .
---
Signif. codes:  0 '***' 0.001 '**' 0.01 '*' 0.05 '.' 0.1 ' ' 1

Rcmdr> GLM.42 <- glm(Person_ABS ~ W.WO.Rider, family=gaussian(identity),
Rcmdr+   data=Dataset)

Rcmdr> summary(GLM.42)

Call:
glm(formula = Person_ABS ~ W.WO.Rider, family = gaussian(identity),
    data = Dataset)

Deviance Residuals:
    Min       1Q   Median       3Q      Max
-0.6956  -0.2913   0.1130   0.3044   0.3217

Coefficients:
              Estimate Std. Error t value Pr(>|t|)
(Intercept)    0.69565    0.07035   9.888 9.44e-13 ***
W.WO.Rider[T.With Rider] -0.01739    0.09949  -0.175   0.862
---
Signif. codes:  0 '***' 0.001 '**' 0.01 '*' 0.05 '.' 0.1 ' ' 1

(Dispersion parameter for gaussian family taken to be 0.113834)

Null deviance: 5.0122  on 45  degrees of freedom
Residual deviance: 5.0087  on 44  degrees of freedom
AIC: 34.539

Number of Fisher Scoring iterations: 2

```

---

```

Rcmdr> anova(GLM.42, GLM.41, test="F")
Analysis of Deviance Table

Model 1: Person_ABS ~ W.WO.Rider
Model 2: Person_ABS ~ W.WO.Rider + breed
      Resid. Df Resid. Dev Df Deviance      F Pr(>F)

```



```

1      44      5.0087
2      41      3.8341  3   1.1746 4.187 0.01127 *
---
Signif. codes:  0 '***' 0.001 '**' 0.01 '*' 0.05 '.' 0.1 ' ' 1

```

---

```

Rcmdr> Dataset <- readXL("C:/Users/isabe/Desktop/Mappel.xlsx", rownames=FALSE,
Rcmdr+   header=TRUE, na="", sheet="Tabelle2", stringsAsFactors=TRUE)
RcmdrMsg: [13] HINWEIS: Die Datenmatrix 'Dataset' hat 23 Zeilen und 27 Spalten.

```

```

Rcmdr> with(Dataset, tapply(ABS.Person.with.rider, breed, median, na.rm=TRUE))
draught horse      pony thoroughbred      warmblood
      1.0         0.4         0.8         0.8

```

```

Rcmdr> kruskal.test(ABS.Person.with.rider ~ breed, data=Dataset)

```

Kruskal-wallis rank sum test

```

data: ABS.Person.with.rider by breed
Kruskal-wallis chi-squared = 4.4311, df = 3, p-value = 0.2185

```

```

Rcmdr> with(Dataset, tapply(ABS.Person.without.rider, breed, median, na.rm=TRUE))
draught horse      pony thoroughbred      warmblood
      1.0         0.4         1.0         0.8

```

```

Rcmdr> kruskal.test(ABS.Person.without.rider ~ breed, data=Dataset)

```

Kruskal-wallis rank sum test

```

data: ABS.Person.without.rider by breed
Kruskal-wallis chi-squared = 7.2812, df = 3, p-value = 0.06345

```

**Result:** No significant difference in the strength of sensory laterality in the person test.

The breed of the horses had a significant influence: Ponies were stronger lateralised than other breeds with and without rider.

**Table S1.** Data.

| Leader number | Rider number | Horse number | Horse name | Presence      | Passive Rider |
|---------------|--------------|--------------|------------|---------------|---------------|
| 1             |              | 1            | Roy        | Without Rider |               |
| 1             | 1            | 1            | Roy        | With Rider    |               |
| 1             |              | 2            | Pesus      | Without Rider |               |
| 1             | 2            | 2            | Pesus      | With Rider    |               |
| 1             |              | 3            | Donald     | Without Rider |               |
| 1             | 1            | 3            | Donald     | With Rider    |               |
| 1             |              | 4            | Julia      | Without Rider |               |
| 1             | 3            | 4            | Julia      | With Rider    |               |
| 2             |              | 5            | Silence    | Without Rider |               |
| 2             | 10           | 5            | Silence    | With Rider    |               |
| 2             |              | 6            | Coco       | Without Rider |               |
| 2             | 10           | 6            | Coco       | With Rider    |               |
| 3             |              | 7            | Fanta      | Without Rider |               |
| 3             | 11           | 7            | Fanta      | With Rider    |               |
| 3             |              | 8            | Unca       | Without Rider |               |
| 3             | 11           | 8            | Unca       | With Rider    |               |
| 4             |              | 9            | Heidi      | Without Rider |               |
| 4             | 4            | 9            | Heidi      | With Rider    |               |
| 4             |              | 10           | Adonis     | Without Rider |               |
| 4             | 4            | 10           | Adonis     | With Rider    |               |
| 4             |              | 11           | Jamie      | Without Rider |               |
| 4             | 4            | 11           | Jamie      | With Rider    |               |
| 5             |              | 12           | Burly      | Without Rider |               |
| 5             | 5            | 12           | Burly      | With Rider    |               |
| 5             |              | 13           | Lenny      | Without Rider |               |
| 5             | 5            | 13           | Lenny      | With Rider    |               |
| 5             |              | 14           | Hobbit     | Without Rider |               |
| 5             | 5            | 14           | Hobbit     | With Rider    |               |
| 6             |              | 15           | Clay       | Without Rider |               |
| 6             | 6            | 15           | Clay       | With Rider    |               |
| 7             |              | 16           | Apolo      | Without Rider |               |
| 7             | 7            | 16           | Apolo      | With Rider    |               |
| 7             |              | 17           | Capsius    | Without Rider |               |
| 7             | 7            | 17           | Capsius    | With Rider    |               |
| 8             |              | 18           | Günther    | Without Rider |               |
| 8             | 9            | 18           | Günther    | With Rider    |               |
| 9             |              | 19           | Dakkar     | Without Rider |               |
| 9             | 8            | 19           | Dakkar     | With Rider    |               |
| 9             |              | 20           | Lucky      | Without Rider |               |
| 9             | 8            | 20           | Lucky      | With Rider    |               |
| 9             |              | 21           | Don        | Without Rider |               |
| 9             | 8            | 21           | Don        | With Rider    |               |
| 7             |              | 22           | Romero     | Without Rider |               |
| 7             | 7            | 22           | Romero     | With Rider    |               |

|   |   |    |      |               |
|---|---|----|------|---------------|
| 7 |   | 23 | Alek | Without Rider |
| 7 | 7 | 23 | Alek | With Rider    |

| Motor Laterality Index | Motor Laterality Index ABS |
|------------------------|----------------------------|
| 0                      | 0,0                        |
| 0,8                    | 0,8                        |
| 0,4                    | 0,4                        |
| 0,2                    | 0,2                        |
| 0,6                    | 0,6                        |
| 0,6                    | 0,6                        |
| -0,2                   | 0,2                        |
| -0,4                   | 0,4                        |
| -0,2                   | 0,2                        |
| -0,6                   | 0,6                        |
| 0                      | 0,0                        |
| 0,4                    | 0,4                        |
| -0,6                   | 0,6                        |
| -1                     | 1,0                        |
| 0                      | 0,0                        |
| -0,4                   | 0,4                        |
| 0,4                    | 0,4                        |
| 0,4                    | 0,4                        |
| 0,4                    | 0,4                        |
| -0,2                   | 0,2                        |
| 0                      | 0,0                        |
| -0,2                   | 0,2                        |
| -0,2                   | 0,2                        |
| 0,6                    | 0,6                        |
| -0,2                   | 0,2                        |
| -0,6                   | 0,6                        |
| -0,2                   | 0,2                        |
| 0                      | 0,0                        |
| -0,2                   | 0,2                        |
| -1                     | 1,0                        |
| 0                      | 0,0                        |
| 0                      | 0,0                        |
| -0,4                   | 0,4                        |
| -0,2                   | 0,2                        |
| 0,4                    | 0,4                        |
| 0,6                    | 0,6                        |
| 0,4                    | 0,4                        |
| 0,4                    | 0,4                        |
| 0                      | 0,0                        |
| 0,4                    | 0,4                        |
| 0                      | 0,0                        |
| 0,2                    | 0,2                        |
| 0,2                    | 0,2                        |
| -0,4                   | 0,4                        |

|     |     |
|-----|-----|
| 0,2 | 0,2 |
| 0   | 0,0 |

| Sensory Laterality Novel Object Index | Sensory Laterality Novel Object Index ABS |
|---------------------------------------|-------------------------------------------|
| 0,0                                   | 0,0                                       |
| 0,7                                   | 0,7                                       |
| 0,0                                   | 0,0                                       |
| 0,3                                   | 0,3                                       |
| 0,3                                   | 0,3                                       |
| -0,3                                  | 0,3                                       |
| 1,0                                   | 1,0                                       |
| 0,0                                   | 0,0                                       |
| -0,3                                  | 0,3                                       |
| 0,3                                   | 0,3                                       |
| 0,3                                   | 0,3                                       |
| -0,3                                  | 0,3                                       |
| -0,3                                  | 0,3                                       |
| 0,3                                   | 0,3                                       |
| 1,0                                   | 1,0                                       |
| 1,0                                   | 1,0                                       |
| -0,3                                  | 0,3                                       |
| 1,0                                   | 1,0                                       |
| -1,0                                  | 1,0                                       |
| -0,3                                  | 0,3                                       |
| -0,3                                  | 0,3                                       |
| 1,0                                   | 1,0                                       |
| 1,0                                   | 1,0                                       |
| 0,3                                   | 0,3                                       |
| 0,3                                   | 0,3                                       |
| -0,3                                  | 0,3                                       |
| 0,3                                   | 0,3                                       |
| 1,0                                   | 1,0                                       |
| -0,3                                  | 0,3                                       |
| -1,0                                  | 1,0                                       |
| -0,3                                  | 0,3                                       |
| 0,3                                   | 0,3                                       |
| -0,3                                  | 0,3                                       |
| -1,0                                  | 1,0                                       |
| -1,0                                  | 1,0                                       |
| -0,3                                  | 0,3                                       |
| 1,0                                   | 1,0                                       |
| 1,0                                   | 1,0                                       |
| 0,3                                   | 0,3                                       |
| 0,3                                   | 0,3                                       |
| -0,3                                  | 0,3                                       |
| -0,3                                  | 0,3                                       |
| -1,0                                  | 1,0                                       |
| -0,3                                  | 0,3                                       |

|      |     |
|------|-----|
| -0,3 | 0,3 |
| 0,3  | 0,3 |

| Sensory Laterality Person Test Index | Sensory Laterality Person Test Index ABS | Sex     |
|--------------------------------------|------------------------------------------|---------|
| 0,4                                  | 0,4                                      | gelding |
| 0,2                                  | 0,2                                      | gelding |
| 0,2                                  | 0,2                                      | gelding |
| -0,6                                 | 0,6                                      | gelding |
| 1,0                                  | 1,0                                      | gelding |
| 1,0                                  | 1,0                                      | gelding |
| 0,0                                  | 0,0                                      | mare    |
| 0,0                                  | 0,0                                      | mare    |
| -0,4                                 | 0,4                                      | gelding |
| 0,0                                  | 0,0                                      | gelding |
| 0,6                                  | 0,6                                      | mare    |
| 0,4                                  | 0,4                                      | mare    |
| -0,8                                 | 0,8                                      | mare    |
| -0,8                                 | 0,8                                      | mare    |
| -1,0                                 | 1,0                                      | gelding |
| -0,8                                 | 0,8                                      | gelding |
| 1,0                                  | 1,0                                      | mare    |
| 1,0                                  | 1,0                                      | mare    |
| -1,0                                 | 1,0                                      | gelding |
| -0,8                                 | 0,8                                      | gelding |
| -1,0                                 | 1,0                                      | gelding |
| -1,0                                 | 1,0                                      | gelding |
| -0,4                                 | 0,4                                      | mare    |
| -0,2                                 | 0,2                                      | mare    |
| -0,4                                 | 0,4                                      | gelding |
| -0,8                                 | 0,8                                      | gelding |
| -0,6                                 | 0,6                                      | gelding |
| -0,2                                 | 0,2                                      | gelding |
| 0,8                                  | 0,8                                      | gelding |
| 0,4                                  | 0,4                                      | gelding |
| 1,0                                  | 1,0                                      | gelding |
| 0,2                                  | 0,2                                      | gelding |
| 0,6                                  | 0,6                                      | gelding |
| 0,8                                  | 0,8                                      | gelding |
| 1,0                                  | 1,0                                      | gelding |
| 0,8                                  | 0,8                                      | gelding |
| 1,0                                  | 1,0                                      | gelding |
| 0,6                                  | 0,6                                      | gelding |
| 1,0                                  | 1,0                                      | gelding |
| -1,0                                 | 1,0                                      | gelding |
| -1,0                                 | 1,0                                      | gelding |



|     |     |         |
|-----|-----|---------|
| 1,0 | 1,0 | gelding |
| 0,8 | 0,8 | gelding |

| Breed         | Age (years) | Training (days per week) | Side of leading |
|---------------|-------------|--------------------------|-----------------|
| pony          | 14          | 6,0                      | left            |
| pony          | 14          | 6,0                      | left            |
| warmblood     | 23          | 1,5                      | left            |
| warmblood     | 23          | 1,5                      | left            |
| thoroughbred  | 29          | 4,0                      | left            |
| thoroughbred  | 29          | 4,0                      | left            |
| pony          | 21          | 7,0                      | left            |
| pony          | 21          | 7,0                      | left            |
| thoroughbred  | 4           | 5,0                      | left            |
| thoroughbred  | 4           | 5,0                      | left            |
| pony          | 6           | 4,0                      | left            |
| pony          | 6           | 4,0                      | left            |
| warmblood     | 14          | 6,0                      | both            |
| warmblood     | 14          | 6,0                      | both            |
| warmblood     | 6           | 6,0                      | both            |
| warmblood     | 6           | 6,0                      | both            |
| draught horse | 13          | 7,0                      | left            |
| draught horse | 13          | 7,0                      | left            |
| warmblood     | 20          | 7,0                      | left            |
| warmblood     | 20          | 7,0                      | left            |
| draught horse | 16          | 7,0                      | both            |
| draught horse | 16          | 7,0                      | both            |
| warmblood     | 14          | 2,0                      | left            |
| warmblood     | 14          | 2,0                      | left            |
| warmblood     | 11          | 4,0                      | left            |
| warmblood     | 11          | 4,0                      | left            |
| warmblood     | 16          | 3,5                      | left            |
| warmblood     | 16          | 3,5                      | left            |
| warmblood     | 4           | 3,5                      | left            |
| warmblood     | 4           | 3,5                      | left            |
| warmblood     | 9           | 6,0                      | left            |
| warmblood     | 9           | 6,0                      | left            |
| warmblood     | 11          | 2,5                      | left            |
| warmblood     | 11          | 2,5                      | left            |
| pony          | 7           | 6,0                      | both            |
| pony          | 7           | 6,0                      | both            |
| warmblood     | 12          | 7,0                      | both            |
| warmblood     | 12          | 7,0                      | both            |
| pony          | 13          | 7,0                      | left            |
| pony          | 13          | 7,0                      | left            |
| warmblood     | 12          | 7,0                      | both            |
| warmblood     | 12          | 7,0                      | both            |
| warmblood     | 16          | 1,0                      | left            |
| warmblood     | 16          | 1,0                      | left            |

|           |    |     |      |
|-----------|----|-----|------|
| thoroughb | 10 | 1,0 | left |
| thoroughb | 10 | 1,0 | left |
